# Supplementary material for: Direct visualization of domain wall pinning in sub-100 nm 3D magnetic nanowires with cross-sectional curvature
Source: Royal Society of Chemistry journal article supplement (doi:10.1039/d4nr02020k), 2024-01-01
Supplement: d4nr02020k1.pdf [file d4nr02020k1.pdf]

1 **Supplementary Information**

2 **Direct visualization of domain wall pinning in sub-100nm 3D**  
3 **magnetic nanowires with cross-sectional curvature**

4 *Joseph Askey<sup>‡</sup>, Matthew Oliver Hunt<sup>‡</sup>, Lukas Payne, Arjen van den Berg, Ioannis*  
5 *Pitsios<sup>††</sup>, Alaa Hejazi<sup>†††</sup>, Wolfgang Langbein and Sam Ladak<sup>\*</sup>*

6 **PSF Calculation.** The electric field of the focused light through a high-NA objective lens  
7 is calculated numerically using vectorial diffraction theory evaluating of the Debye-Wolf  
8 integral using a chirp-z transform (or Bluestein method), following the work by Hu et al.  
9 [1] and Leutenegger et al. [2]. The  $\lambda = 405$  nm circularly polarized voxel focused through  
10 an oil-immersion ( $n = 1.518$ ) objective lens with NA = 1.4 is shown in Figure 3(a),  
11 illustrated by the intensity square ( $I$ ) isosurfaces (since the exposure dose  $\propto I^2$ ), with the  
12 innermost and darkest isosurface corresponding to 80% of the total normalized  $I^2$   
13 (sequentially larger and lighter isosurfaces correspond to 60, 40 and 20%). The voxel width  
14 is  $L_{xy} = 66$  nm and the voxel length  $L_z = 164$  nm, leading to an aspect ratio of  $\beta = 2.48$ . The  
15 FWHM of the lateral  $I^2$  profile is 118 nm. From the measured widths in Figure 2, one can  
16 also determine the FWHM of the excitation voxel assuming a Gaussian excitation pulse with  
17 dose of the form  $I(r)^2 = \frac{1}{v} \exp(-(r/b)^2)$  where  $v$  is the scanning velocity,  $r$  is radial  
18 distance from the beam focus, and  $b$  (the fitting parameter) is the lateral width of the voxel,  
19 using  $\text{FWHM} = 2\sqrt{\ln(2)} b$ , which leads to a FWHM of 107 nm for  $L = 5 \mu\text{m}$ , which is a 9%

20 difference compared to the simulated FWHM. For  $L = 2 \mu\text{m}$  we find a FWHM of 90 nm  
21 yielding a 24% difference, and for  $L = 1 \mu\text{m}$  a FWHM of 113 nm giving a 4% difference to  
22 the simulation.

23

24 **Quantitative differential interference contrast microscopy (qDIC).** This was performed  
25 on a custom-built imaging set-up as described by Regan et al. [3, 4] and Hamilton et al. [5].  
26 The imaging was carried out using a Nikon green interference filter (center wavelength  $\lambda$   
27 = 550 nm), a de-Sénarmont compensator (a rotatable linear polariser and quarter-wave  
28 plate, Nikon T-P2 DIC Polariser HT MEN51941) controlling the phase offset, an oil  
29 immersion 1.34NA condenser MEL41410 with a Nikon N2 DIC module MEH52500, and a  
30 water-immersion ( $n = 1.333$ ) 60 $\times$  1.27 NA objective lens (Nikon plan-apochromat  
31 MRD70650) with a DIC slider (Nikon MBH76264), a linear polariser (Nikon Ti-A-E DIC  
32 Analyser Block MEN51980), and a 1 $\times$  tube lens. All images were acquired using a scientific-  
33 CMOS camera (PCO Edge 5.5 RS, PCO) of 30 ke full well capacity and 16-bit digitisation.  
34 Pairs of DIC images using an exposure time of 2.7 ms and a field of view of 278  $\mu\text{m} \times$  234  
35  $\mu\text{m}$  (2560  $\times$  2160 pixels) were taken at polarizer angles of  $\pm 30^\circ$ , called  $I_{\pm}$ , and combined into  
36 a contrast image using  $I = (I_+ - I_-)/(I_+ + I_-)$ , and then converted into a qDIC image using  
37 the procedure detailed in [6]. The cross-sectional area  $A_c$  and polymer width  $w$  are  
38 calculated as the average of two signal-to-noise ratio qDIC images,  $\kappa = 500$  and  $\kappa = 5000$ ,  
39 with values  $A_c = 0.057 \mu\text{m}^2$  and  $w = 100 \text{ nm}$ . This leads to a mean axial extent  $l = \frac{4A_c}{\pi w} = 725$   
40 nm. Comparing with SEM on nominally identical samples with a 50 nm Permalloy layer

41 we find lateral features of 133 nm, giving a percentage difference between SEM and qDIC  
42 of 20% when considering an approximate 7 nm lateral offset contributed by the Permalloy  
43 layer.

44 **Field From MFM Tip.** In the following calculations we utilize a coordinate system as  
45 shown in Fig 4a, whereby the  $z$ -axis is perpendicular to the substrate and the  $x$ -axis is in  
46 the substrate plane, aligned with the nanowire long axis. The field from the tip is estimated  
47 using a dipolar expression  $\mu_0 \mathbf{H}_{\text{tip}} = \frac{\mu_0}{4\pi} (3 \mathbf{r} (\boldsymbol{\mu} \cdot \mathbf{r}) / |\mathbf{r}|^5 - \boldsymbol{\mu} / |\mathbf{r}|^3)$ , with magnetic moment  
48  $\boldsymbol{\mu} = (0, 0, \mu_{\text{tip}})$ , i.e magnetized out-of-plane, and position vector  $\mathbf{r} = (0, 0, z)$ , i.e the  
49 magnetic moment and the position vector are assumed to be purely a function of  $z$ . This  
50 estimation leads to a field magnitude of  $\mu_0 |\mathbf{H}_{\text{tip}}| = 14.6$  mT at the surface of the nanowire.  
51 The MFM images were captured within an externally applied magnetic field  $\mu_0 \mathbf{H}_{\text{ext}}$ , using  
52 a bespoke quadrupole electromagnet. The applied field was oriented along the wire long  
53 axis, labelled  $x$ -axes in Figures 4 and 5. The total field  $\mu_0 \mathbf{H}_{\text{tot}}$  is the vector sum of the  
54 external field  $\mu_0 \mathbf{H}_{\text{ext}}$  and the tip field  $\mu_0 \mathbf{H}_{\text{tip}}$ , projected along the local SNW tangent. This  
55 yields a field magnitude of  $\mathbf{H}_{\text{tot}} = \mathbf{H}_{\text{ext}} \cos(\phi) + \mathbf{H}_{\text{tip}} \cos(\theta)$  where  $\phi$  is the angle  
56 subtended between the  $x$ -axis and the long axis of the nanowire and  $\theta$  is the angle sub-  
57 tended between the  $z$ -axis and the nanowire tangent. The height derivative of the AFM  
58 profiles  $dz/dx$  was smoothed using a 3-pixel rolling average, corresponding to a spatial  
59 averaging of 30 nm and allowed a direct calculation of  $\theta$  and  $\phi$ .

60 **Estimating Depinning Fields.** The Becker-Kondorski model predicts that local minima in  
61 the energy landscape give rise to DW pinning, and that the depinning field  $H_{\text{BK}}$  is

62 proportional to the slope of the position-dependent energy landscape  $\varepsilon(x)$  [7-9], which can  
 63 be written as  $|\mathbf{H}_{\text{BK}}| = (1/2\mu_0 M_s S) d\varepsilon/dx$ , where  $S$  is the cross-sectional area. We simplify  
 64 the analysis by considering a simple planar strip with comparable geometric parameters  
 65 with width  $w = 80$  nm and thickness  $t = 40$  nm, where  $S = wt$ , and the surface area over  
 66 element  $\delta x$  is  $\mathcal{S} = w\delta x$ . To estimate  $|\mathbf{H}_{\text{BK}}|$  we simplify the energy  $\varepsilon(x)$  formulation by  
 67 Bruno et al. by considering that roughness features along the SNW are not correlated (as  
 68 we attribute power fluctuations in the laser give rise to the dominant roughness along the  
 69 SNW), such that we can estimate  $\varepsilon(x) = 0.45 \mu_0 \mathcal{S} M_s^2 \frac{\sigma}{4}$ , where  $\sigma$  is the RMS roughness of  
 70 the SNW in an element  $\delta x$ . The slope of this potential landscape is therefore  $\frac{d\varepsilon}{dx} =$   
 71  $0.45\mu_0 w M_s^2 \frac{\sigma}{4}$ , and the depinning field in the present case is  $|\mathbf{H}_{\text{BK}}| = \frac{9}{160} \frac{M_s \sigma}{t}$ . The RMS  
 72 roughness  $\sigma$  is determined by extracting the high frequency components of the AFM profile  
 73 using a cut-off frequency 20% of the total addressable length in the profile. This  
 74 corresponds to 720 nm for  $L = 5$   $\mu\text{m}$ ; 430 nm for  $L = 2$   $\mu\text{m}$ , and 420 nm for  $L = 1$   $\mu\text{m}$ . The  
 75 roughness as a function of position  $\sigma(x)$  is then calculated over the binning sizes of the DW  
 76 pinning heatmaps shown in Figure 5 with value  $\delta x = 313$  nm for  $L = 5$   $\mu\text{m}$ , and  $\delta x = 250$  nm  
 77 for  $L = 2$   $\mu\text{m}$ . For  $L = 1$   $\mu\text{m}$ , the roughness  $\sigma$  is calculated over an element equal to the cut-  
 78 off frequency length with value  $\delta x = 420$  nm.

79

80

81

82

83

84

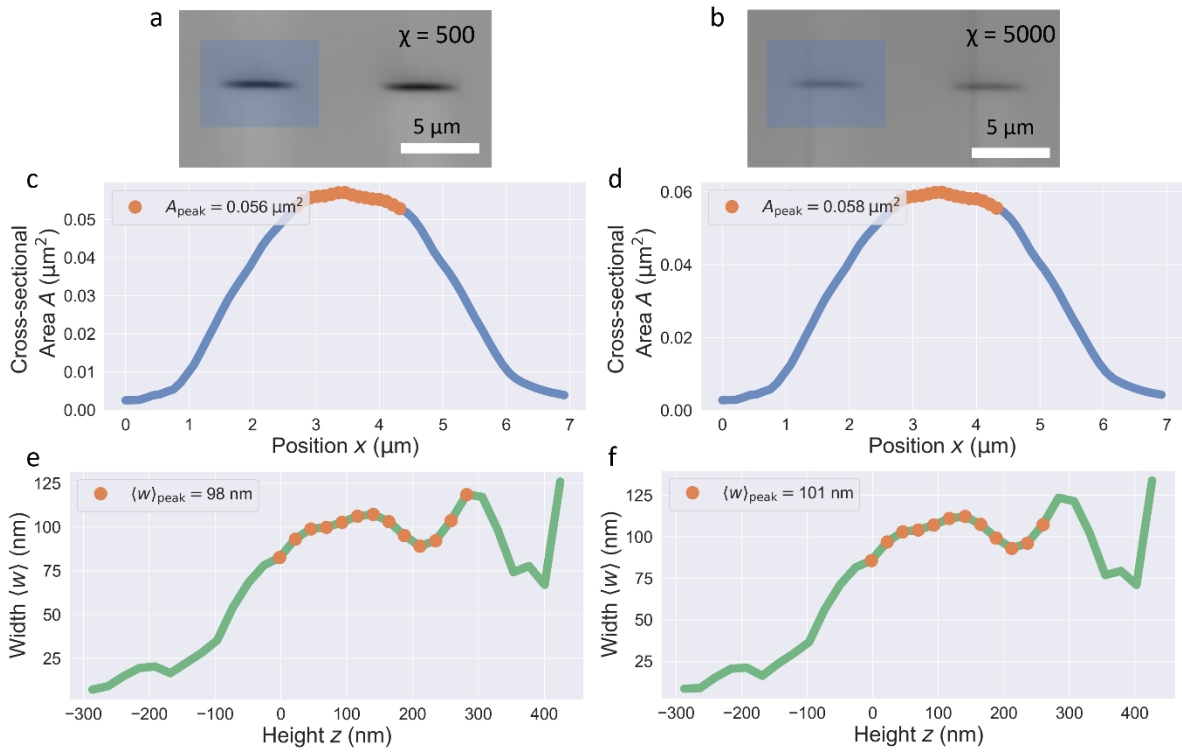

85

86 **Figure S1.** (a) Quantitative differential interference contrast phase images of  $L = 5 \mu\text{m}$  and  
 87  $A = 1 \mu\text{m}$ . SNWs with different signal-to-noise ratios for  $\chi = 500$ , (b) and  $\chi = 5000$ . Scale  
 88 bar is  $5 \mu\text{m}$ . (c) Extracted SNW cross-sectional areas  $A$  as function of lateral position (as  
 89 indicated by shaded blue lines in the phase images) for  $\chi = 500$ , (d) and  $\chi = 5000$ . The orange  
 90 data points correspond to the values within 10% of the peak which indicate regions where  
 91 the SNW is completely extruded above substrate, and the peak cross-sectional area  $A_{\text{peak}}$  is  
 92 taken as the mean of these values. (e) Mean width  $\langle w \rangle$  of ascending and descending regions  
 93 of the SNW as function of SNW height above substrate for  $\chi = 500$ , (f) and  $\chi = 5000$ . The  
 94 mean peak width  $\langle w \rangle_{\text{peak}}$  is taken as the mean of the orange data points.

95

96

97

98

99

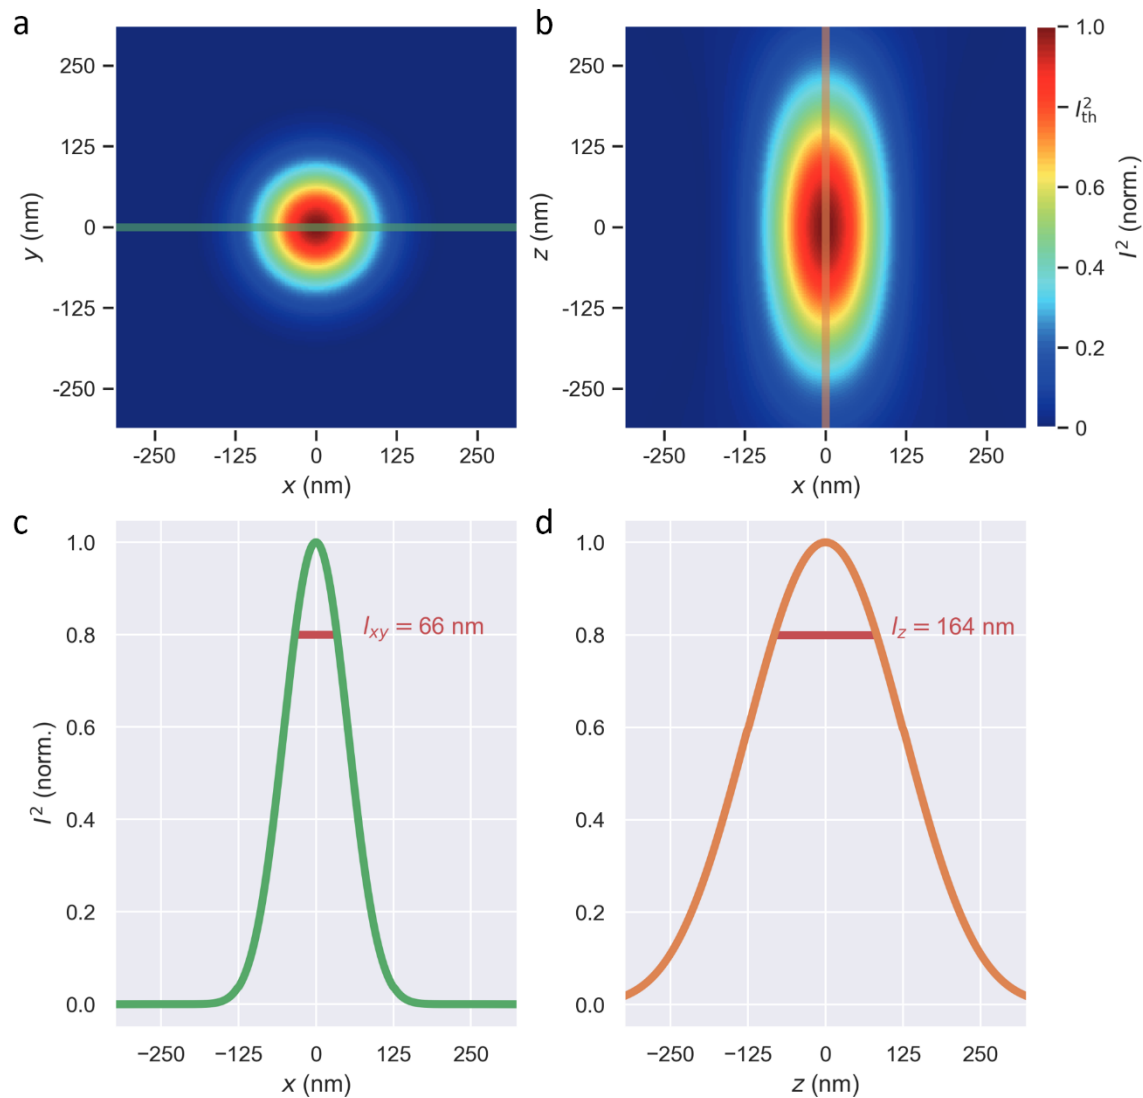

100

101 **Figure S2.** (a) Numerically simulated lateral intensity square  $I^2$  profile of circularly  
 102 polarized  $\lambda = 405$  nm beam focused through an  $\text{NA} = 1.4$  objective lens into an immersion  
 103 medium with refractive index  $n = 1.518$  at  $z = 0$ , fill factor 1.67. (b) Axial profile at  $y = 0$ .  
 104 (c) Lateral line profile of the focus, green line in (a), with  $L_{xy} = 66$  nm at threshold ( $I^2 = 0.8$ ).  
 105 (d) Axial line profile of focus, orange line in (b), with  $L_z = 164$  nm at threshold.

106

107

108

109

110

111

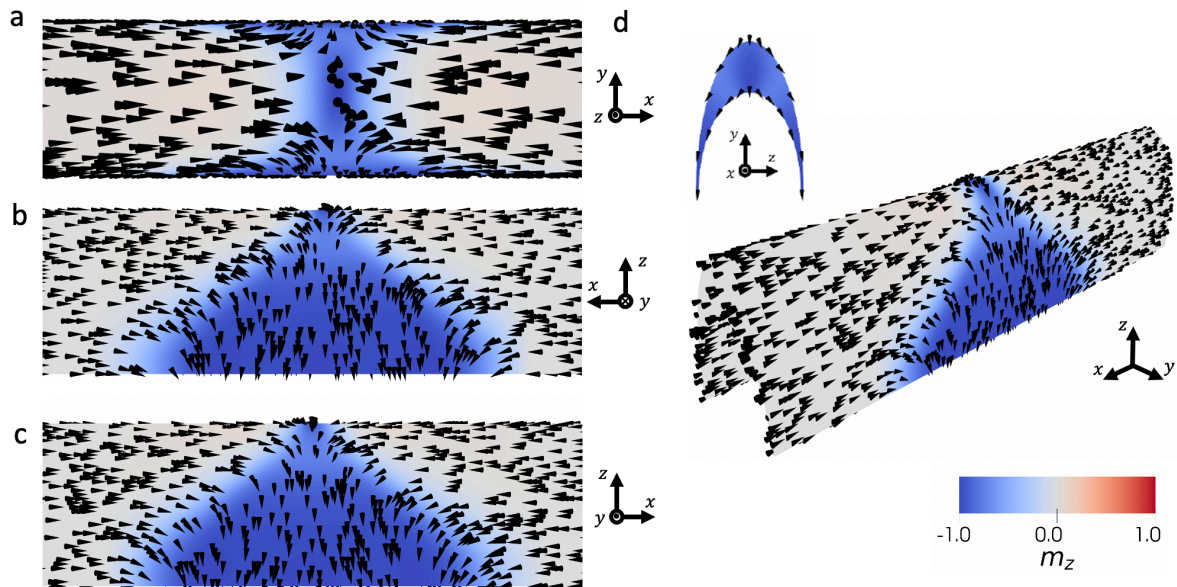

112

113 **Figure S3:** An anti-vortex domain wall texture. (a) Top view. (b,c) Side views. (d) 3D view.

114 The wall consists of a transverse spin texture on either side, with an anti-vortex stabilized  
115 at the curvature apex.

116

117

118

119

120

121

122

123

124

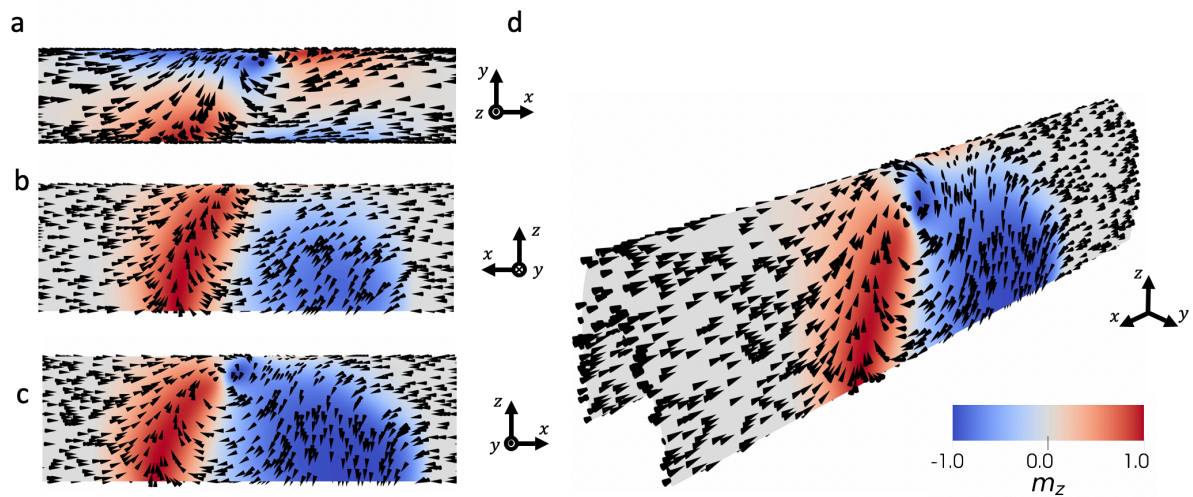

125

126 **Figure S4:** A vortex domain wall texture. (a) Top view. (b,c) Side views. (d) 3D view. The  
127 wall consists of a single vortex texture, that spans across both sides of the nanowire. The  
128 vortex core is found to be located just off the apex of curvature.

129

130

131

132

133

134

135

136

137

138

139



140

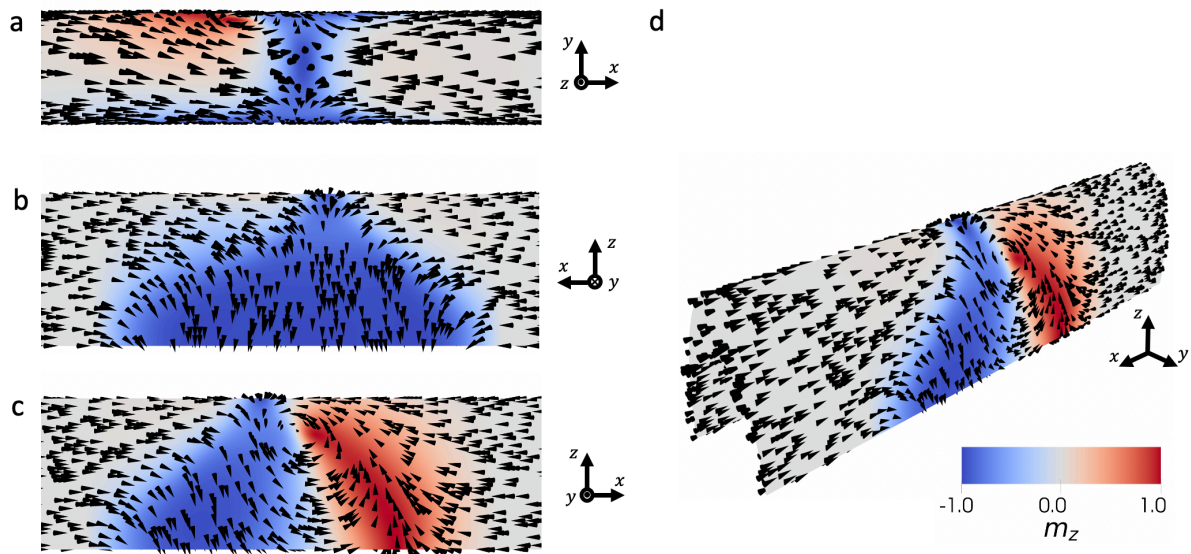

141

142 **Figure S5:** An Anti-vortex/vortex domain wall texture. (a) Top view. (b,c) Side views. (d)  
143 3D view. The wall consists of a transverse spin texture on one side, with vortex on the  
144 remaining side. An anti-vortex is found to be stabilized at the apex of curvature.

145

146

147

148

149

150

151

152

153

154

155

156

157

158

159

160

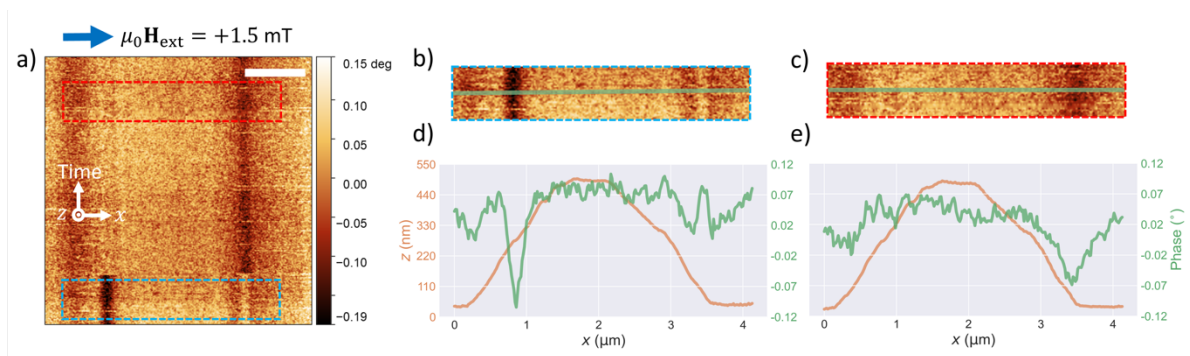

161

162 **Figure S6.** (a) MFM image of  $L = 5 \mu\text{m}$  wire under applied field  $\mu_0 \mathbf{H}_{\text{ext}} = + 1.5 \text{ mT}$ . (b-c) Red  
163 and blue dotted regions correspond those shown in (a). (d-e) Line profiles of the normalised  
164 phase change, green, in (b-c) superimposed on the AFM profiles, orange.

165

166

167

168

169

170

171

172

173

174

175

176

177

178

179

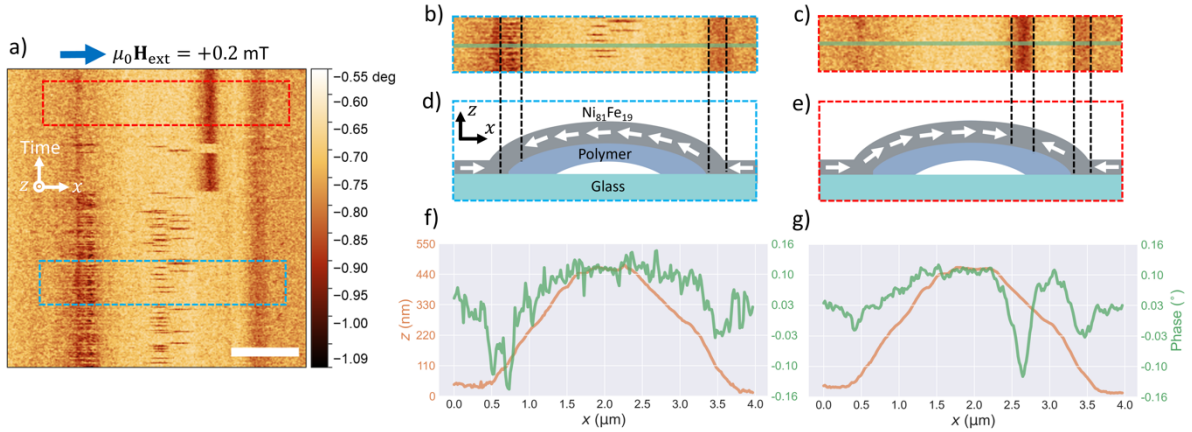

180

181

182 **Figure S7.** (a) MFM image shown in Figure 4(c-d). (b-c) Blue and red dotted regions  
 183 correspond to those shown in (a). (d-e) Schematics of the expected local magnetization  
 184 textures in (b-c) considering the net phase change and the tip magnetization. (f-g) Line  
 185 profiles of the normalised phase change, green, in (b-c) superimposed on the AFM profiles,  
 186 orange. The DW positions are indicated by the large negative phase shift.

187

188

189

190

191

192

193

194

195

196

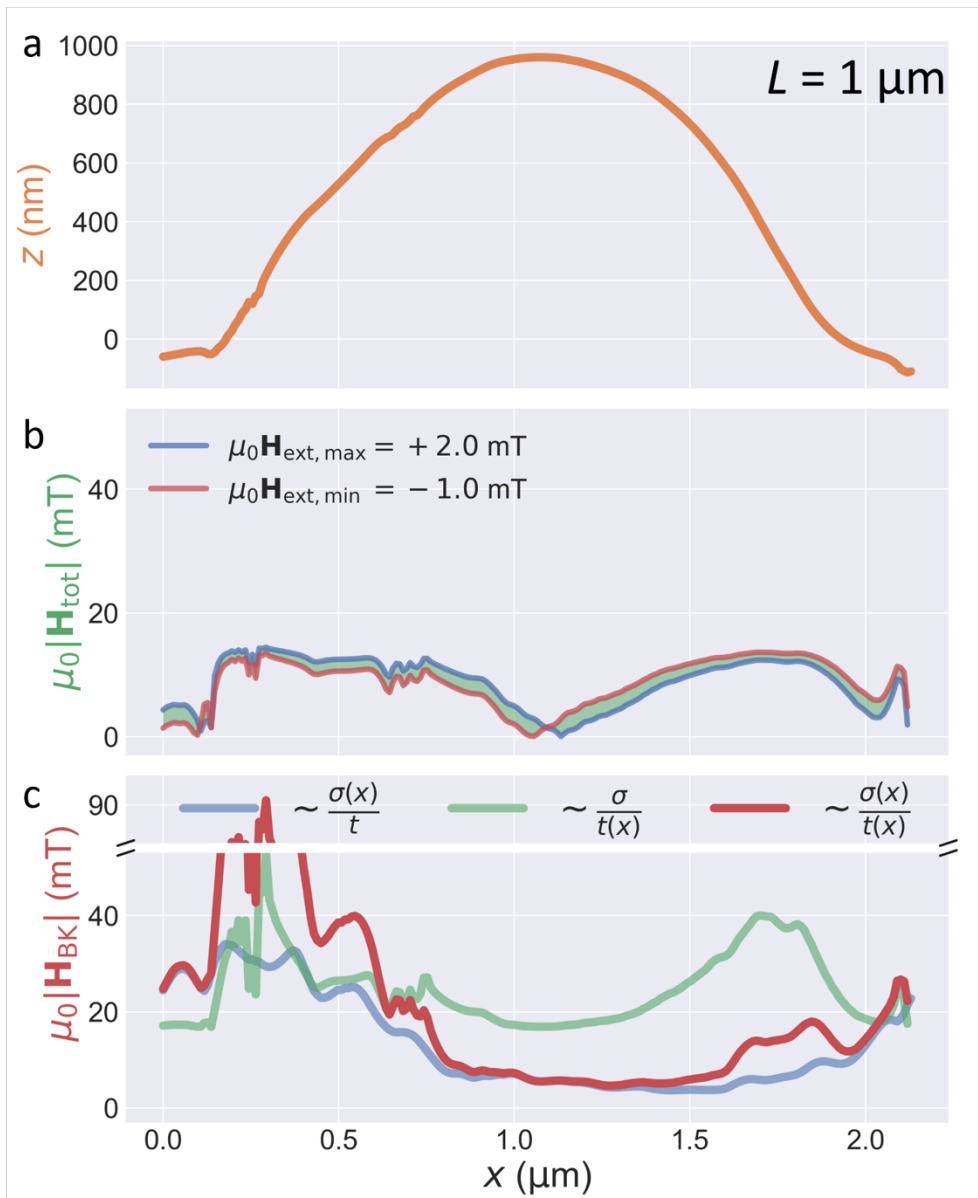

197

198

199 **Figure S8** (a) AFM line profile for a  $L = 1 \mu\text{m}$  SNW. (b) Total field magnitude  $\mu_0 |\mathbf{H}_{\text{tot}}|$  due  
 200 to external field  $\mu_0 \mathbf{H}_{\text{ext}}$  and field from MFM tip  $\mu_0 \mathbf{H}_{\text{tip}}$  projected along SNW tangent. (c)  
 201 Becker-Kondorski depinning field magnitude  $\mu_0 |\mathbf{H}_{\text{BK}}|$  for varying roughness constant  
 202 thickness (blue line), constant roughness varying thickness (green line) and varying  
 203 roughness and thickness (red).

204

| DW Type | $\epsilon_{\text{exc}}$ (J/m <sup>3</sup> ) |          | $\epsilon_{\text{mag}}$ (J/m <sup>3</sup> ) |          | $\epsilon_{\text{tot}}$ (J/m <sup>3</sup> ) |          |
|---------|---------------------------------------------|----------|---------------------------------------------|----------|---------------------------------------------|----------|
|         | H-H                                         | T-T      | H-H                                         | T-T      | H-H                                         | T-T      |
| CTW     | 1672.601                                    | 1671.421 | 11484.55                                    | 11485.59 | 13157.15                                    | 13157.01 |
| AVW     | 1714.26                                     | 1714.173 | 11686.9                                     | 11687.03 | 13401.16                                    | 13401.2  |
| TVW     | 3630.671                                    | 3632.208 | 9891.096                                    | 10819.29 | 13521.77                                    | 13521.27 |
| AVVW    | 2933.599                                    | 2935.199 | 10820.09                                    | 9889.062 | 13753.69                                    | 13754.49 |

205

206 **Table 1:** Energy density components for all simulated domain wall types in both head-to-  
207 head (H-H) and tail-to-tail (T-T) configurations.

208

209 Supplementary References

- 210 1. Hu, Y., et al., *Efficient full-path optical calculation of scalar and vector diffraction*  
211 *using the Bluestein method*. Light: Science & Applications, 2020. **9**(1), p. 119-130.  
212 2. Leutenegger, M., et al., *Fast focus field calculations*. Optics Express, 2006. **14**(23):  
213 p.11277-11291.  
214 3. Regan, D., et al. *Measuring sub-nanometre thickness changes during phase*  
215 *transitions of supported lipid bilayers with quantitative differential interference*  
216 *contrast microscopy*. in *SPIE BiOS*. 2019. San Francisco, USA: Proc. SPIE.  
217 4. Regan, D., et al., *Lipid Bilayer Thickness Measured by Quantitative DIC Reveals*  
218 *Phase Transitions and Effects of Substrate Hydrophilicity*. Langmuir, 2019. **35**(43):  
219 p. 13805-13814.  
220 5. Hamilton, S., et al., *Sizing individual dielectric nanoparticles with quantitative*  
221 *differential interference contrast microscopy*. Analyst, 2022. **147**(8): p. 1567-1580.  
222 6. Pope, I., et al., *Coherent anti-Stokes Raman scattering microscopy of single*  
223 *nanodiamonds*. Nature Nanotechnology, 2014. **9**(11): p. 940-946.  
224 7. Schöbitz, M., et al., *A Material View on Extrinsic Magnetic Domain Wall Pinning*  
225 *in Cylindrical CoNi Nanowires*. The Journal of Physical Chemistry C, 2023.  
226 **127**(5): p. 2387-2397.  
227 8. Bruno, P., *Dipolar magnetic surface anisotropy in ferromagnetic thin films with*  
228 *interfacial roughness*. Journal of Applied Physics, 1988. **64**(6): p. 3153-3156.

229 9. Skomski, R., *Simple Models of Magnetism*. 2008: Oxford University Press.

230

231

232

233

234

235
